# Supplementary material
Source: publisher figshare collection journal article supplement (https://acs.figshare.com/ndownloader/files/7990174)
Supplement: Supplementary file 1 [file 7990174]

**Supplement.** Effect of aging time on the zeta potential of Solid/Brine and Oil/Brine interfaces

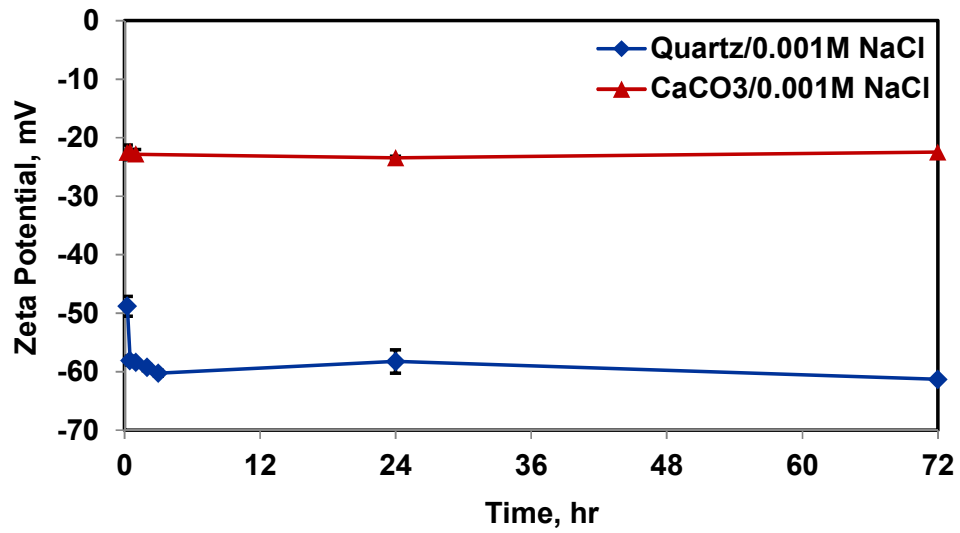

Figure 1: Effect of aging time on the zeta potential of Rock/Brine interfaces.

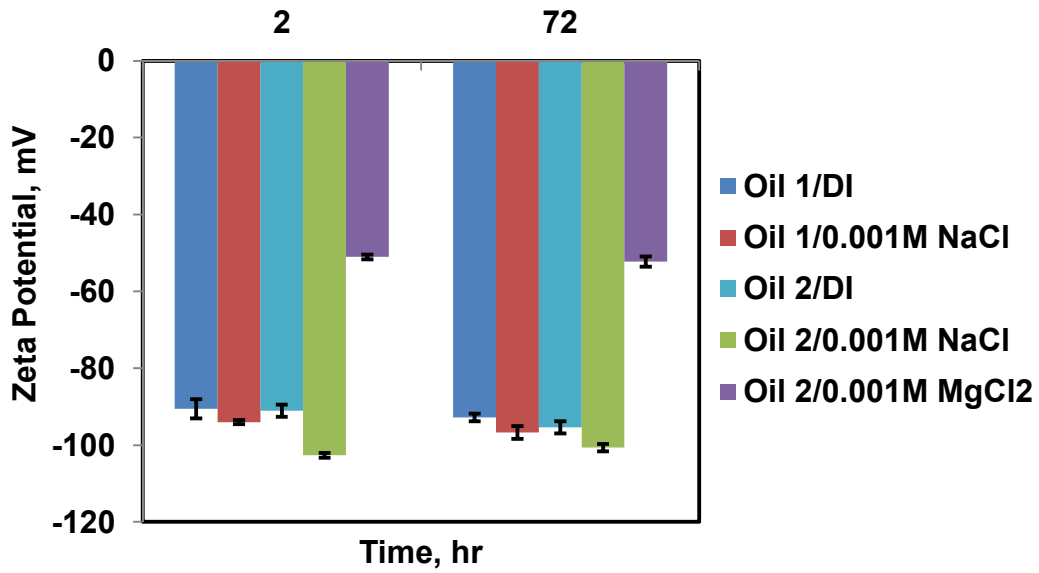

Figure 2: Effect of aging time on the zeta potential of Oil/Brine interfaces.
